# Supplementary material
Source: publisher site journal article supplement (https://www.dovepress.com/get_supplementary_file.php?f=370970.docx)
Supplement: Supplementary file 1 [file get_supplementary_file.php]

Supplementary Table 1 Baseline characteristics and outcomes of patients grouped by different types of fracture.

| Variables | Patients with intertrochanteric fractures | Patients with femoral neck fractures | P-value |
| --- | --- | --- | --- |
| Demographic characteristics |  |  |  |
| Sex(female) | 100 (74.1%) | 113 (68.1%) | 0.255 |
| Age(years) | 78.4 ± 9.80 | 73.70 ± 9.98 | <0.001 |
| BMI (kg/m2 ) | 23.32 ± 4.89 | 22.92 ± 3.19 | 0.958 |
| Residence (rural) | 8 (5.9%) | 4 (2.4%) | 0.121 |
| Fractures history (yes) | 18 (13.3%) | 28 (16.9%) | 0.397 |
| Smoking history (yes) | 5 (3.7%) | 15 (9.0%) | 0.065 |
| Alcoholism history(yes) | 3 (2.2%) | 5 (3.0%) | 0.735 |
| Position of fracture(right) | 54 (40.0%) | 78 (47.0%) | 0.224 |
| Surgery-related variables |  |  |  |
| Surgical procedures((arthroplasty) | 2 (1.5%) | 139 (83.7%) | <0.001 |
| Anesthesia (spinal) | 0 (0.0%) | 3 (1.8%) | 0.255 |
| Time from injury to surgery (Days) | 5.02 ± 2.55 | 6.28 ± 8.19 | 0.808 |
| CCI score (>4) | 27 (20.0%) | 36 (21.7%) | 0.721 |
| Electrocardiogram (abnormal) | 82 (60.7%) | 91 (54.8%) | 0.301 |
| Chest radiograph (abnormal) | 72 (53.3%) | 72 (43.4%) | 0.085 |
| Hypertension(yes) | 77 (57.0%) | 82 (49.4%) | 0.187 |
| Polytrauma(yes) | 19 (14.1%) | 15 (9.0%) | 0.170 |
| Laboratory findings |  |  |  |
| Hb (g/L) | 106.30 ± 21.29 | 121.96 ± 16.60 | <0.001 |
| INR | 1.06 ± 0.15 | 1.04 ± 0.11 | 0.170 |
| GLU (mmol/L) | 6.96 ± 2.60 | 6.60 ± 3.32 | 0.018 |
| ALB (g/L) | 37.25 ± 4.19 | 38.73 ± 4.51 | 0.003 |
| SOD (U/mL) | 130.00 ± 28.68 | 140.60 ± 28.45 | <0.001 |
| Glutathione reductase (U/L) | 56.08 ± 11.91 | 59.99 ± 12.97 | 0.007 |
| SOD (≤ 112.5 U/mL) | 33 (24.4%) | 25 (15.1%) | 0.040 |
| GR (≤ 52.5 U/L) | 50 (37.0%) | 46 (27.7%) | 0.084 |
| Outcomes |  |  |  |
| Alive at 3 months | 129 (95.6%) | 163 (98.2%) | 0.308 |
| Alive at 6 months | 124 (91.9%) | 161 (97.0%) | 0.048 |
| Alive at 1 year | 108 (80.0%) | 143 (86.1%) | 0.154 |
| With free walking ability at 3 months | 30 (22.2%) | 28 (16.9%) | 0.241 |
| With free walking ability at 6 months | 66 (48.9%) | 98 (59.0%) | 0.079 |
| With free walking ability at 1 year | 80 (59.3%) | 122 (73.5%) | 0.009 |

**Note:** Continuous variables were expressed as mean ± standard deviation and categorical variables were presented as count (percent). BMI, body mass index; Hb, Hemoglobin; INR, international normalized ratio; GLU, blood glucose; ALB, albumin; SOD, superoxide dismutase; GR, glutathione reductases.

Supplementary Table 2 Summary of C indices of Cox models and comparison of C indices.

|  | Model 1 | Model 2 | p |
| --- | --- | --- | --- |
| C index (95%CI) | 0.832 (0.783-0.881) | 0.822 (0.771-0.873) | 0.818 |
|  | Model 3 | Model 4 |  |
| C index (95%CI) | 0.831 (0.778-0.884) | 0.821 (0.768-0.874) | 0.540 |

Note: Model 1 and Model 3 were adjusted for age, type of fracture, hypertension, Hb, CCI score, sex, time from injury to surgery, and ALB. Model 2 and Model 4 were fully adjusted. Continuous SOD and GR were analyzed in Model 1 and Model 2. Grouped SOD and GR were included in Model 3 and Model 4. Model 1 and Model 3 were direct entry models while Model 2 and Model 4 were conditional stepwise forward models.
